# Supplementary material for: RhesusBase PopGateway: Genome-Wide Population Genetics Atlas in Rhesus Macaque
Source: PubMed Central journal article supplement — Mol Biol Evol. 2016 Feb 16;33(5):1370–5. doi: 10.1093/molbev/msw025 (PMC4839223; doi:10.1093/molbev/msw025), 2016-02-16
Supplement: supp_msw025_Supplementary_Tables_S2-S5_andd_S7.pdf [file supp_msw025_Supplementary_Tables_S2-S5_andd_S7.pdf]

## Tables

**Table S2. Meta information of 103 human individuals**

| <b>Sample</b> | <b>Population</b> | <b>Sex</b> | <b>Depth</b> |
|---------------|-------------------|------------|--------------|
| HG02095       | ACB               | Female     | 10.78        |
| HG02107       | ACB               | Male       | 40.28        |
| HG02283       | ACB               | Male       | 17.65        |
| HG02332       | ACB               | Male       | 17.82        |
| HG02419       | ACB               | Female     | 13.21        |
| HG02479       | ACB               | Female     | 9.78         |
| HG02484       | ACB               | Male       | 12.5         |
| HG02485       | ACB               | Female     | 10.64        |
| HG02508       | ACB               | Female     | 11.04        |
| HG02537       | ACB               | Female     | 17.45        |
| HG02282       | ACB               | Female     | 14.74        |
| HG01886       | ACB               | Female     | 14.86        |
| HG02009       | ACB               | Male       | 15.56        |
| NA19904       | ASW               | Male       | 8.91         |
| NA19909       | ASW               | Female     | 6.64         |
| NA19914       | ASW               | Female     | 17.84        |
| NA19921       | ASW               | Female     | 14.94        |
| NA19923       | ASW               | Female     | 10.39        |
| NA19984       | ASW               | Male       | 11.16        |
| NA19920       | ASW               | Male       | 15.26        |
| HG03616       | BEB               | Female     | 17.56        |
| HG03796       | BEB               | Female     | 14.18        |
| NA12044       | CEU               | Female     | 13.96        |
| NA12414       | CEU               | Female     | 12.45        |

---

|         |     |        |       |
|---------|-----|--------|-------|
| NA12812 | CEU | Male   | 10.38 |
| NA12872 | CEU | Male   | 9.64  |
| NA12873 | CEU | Female | 9.73  |
| NA12874 | CEU | Male   | 11.27 |
| NA10847 | CEU | Female | 11.97 |
| NA11919 | CEU | Male   | 13.32 |
| NA12342 | CEU | Male   | 16.9  |
| NA18525 | CHB | Female | 12.35 |
| NA18647 | CHB | Male   | 9.99  |
| NA18747 | CHB | Male   | 9.93  |
| NA18749 | CHB | Male   | 9.81  |
| HG01464 | CLM | Male   | 14.31 |
| HG01486 | CLM | Female | 16.45 |
| HG00309 | FIN | Female | 11.05 |
| HG00335 | FIN | Male   | 11.55 |
| HG00337 | FIN | Female | 11.98 |
| HG00345 | FIN | Male   | 11.51 |
| HG00353 | FIN | Female | 11.89 |
| HG00097 | GBR | Female | 10.26 |
| HG00100 | GBR | Female | 14.24 |
| HG00139 | GBR | Male   | 12.11 |
| HG00140 | GBR | Male   | 11.21 |
| HG00236 | GBR | Female | 12.92 |
| HG00250 | GBR | Female | 11.56 |
| HG00256 | GBR | Male   | 11.76 |
| HG00259 | GBR | Female | 11.68 |
| NA21106 | GIH | Female | 10.54 |
| NA21119 | GIH | Male   | 10.6  |
| HG02811 | GWD | Female | 15.45 |

---

---

|         |     |        |       |
|---------|-----|--------|-------|
| HG01697 | IBS | Female | 11.11 |
| HG01770 | IBS | Female | 13.12 |
| HG01771 | IBS | Male   | 13.99 |
| HG01777 | IBS | Male   | 11.5  |
| HG01756 | IBS | Male   | 14.74 |
| HG01757 | IBS | Female | 14.7  |
| HG01761 | IBS | Male   | 14.92 |
| HG01762 | IBS | Female | 14.21 |
| HG01784 | IBS | Female | 18.35 |
| NA18957 | JPT | Female | 9.13  |
| NA18960 | JPT | Male   | 13.44 |
| NA18968 | JPT | Female | 11.07 |
| NA18971 | JPT | Male   | 12.55 |
| NA18974 | JPT | Male   | 12.76 |
| NA18975 | JPT | Female | 10.69 |
| NA18976 | JPT | Female | 13.52 |
| NA18998 | JPT | Female | 10.83 |
| NA19001 | JPT | Female | 9.89  |
| HG02141 | KHV | Male   | 10.47 |
| NA19031 | LWK | Male   | 10.56 |
| NA19038 | LWK | Female | 10.62 |
| NA19307 | LWK | Male   | 11.68 |
| NA19308 | LWK | Male   | 11.76 |
| NA19310 | LWK | Female | 10.18 |
| NA19740 | MXL | Female | 9.9   |
| HG02089 | PEL | Female | 11.02 |
| HG02104 | PEL | Male   | 11.09 |
| HG02286 | PEL | Female | 10.22 |
| HG02301 | PEL | Female | 11.9  |

---

---

|         |     |        |       |
|---------|-----|--------|-------|
| HG00732 | PUR | Female | 30.95 |
| HG00734 | PUR | Female | 10.29 |
| HG01049 | PUR | Female | 7.62  |
| HG01075 | PUR | Male   | 17.01 |
| HG01167 | PUR | Male   | 17.28 |
| HG01176 | PUR | Male   | 17.28 |
| NA20534 | TSI | Male   | 8.46  |
| NA20587 | TSI | Female | 11.93 |
| NA20588 | TSI | Male   | 11.05 |
| NA18504 | YRI | Male   | 12.19 |
| NA18856 | YRI | Male   | 10.34 |
| NA18868 | YRI | Male   | 11.16 |
| NA19095 | YRI | Female | 9.33  |
| NA19119 | YRI | Male   | 12.56 |
| NA19131 | YRI | Female | 11.54 |
| NA19146 | YRI | Male   | 10.67 |
| NA19152 | YRI | Female | 13.64 |
| NA19171 | YRI | Male   | 10.81 |
| NA19184 | YRI | Male   | 10.02 |
| NA19204 | YRI | Female | 11.33 |
| NA19102 | YRI | Female | 14.79 |

---

**Table S3. Population genetics features for protein coding gene in human.**

|                                                               |                      | Autosome |                   |       |       | X Chromosome |                   |       |       |
|---------------------------------------------------------------|----------------------|----------|-------------------|-------|-------|--------------|-------------------|-------|-------|
|                                                               |                      | Median   | Mean $\pm$ SD     | 5%    | 95%   | Median       | Mean $\pm$ SD     | 5%    | 95%   |
| <b>Nucleotide Diversity</b><br>( $\pi \times 10^3$ )          | Synonymous Sites     | 0.772    | 1.203 $\pm$ 1.409 | 0.050 | 3.794 | 0.429        | 0.849 $\pm$ 1.176 | 0.036 | 2.915 |
|                                                               | Non-synonymous Sites | 0.144    | 0.339 $\pm$ 0.513 | 0.011 | 1.268 | 0.061        | 0.202 $\pm$ 0.405 | 0.008 | 0.767 |
|                                                               | CDS                  | 0.331    | 0.481 $\pm$ 0.533 | 0.022 | 1.464 | 0.151        | 0.291 $\pm$ 0.411 | 0.013 | 1.021 |
|                                                               | UTR                  | 0.574    | 0.747 $\pm$ 0.720 | 0.053 | 2.022 | 0.277        | 0.434 $\pm$ 0.518 | 0.028 | 1.286 |
|                                                               | Exon                 | 0.484    | 0.594 $\pm$ 0.481 | 0.075 | 1.464 | 0.240        | 0.338 $\pm$ 0.351 | 0.029 | 0.969 |
|                                                               | Intron               | 0.758    | 0.818 $\pm$ 0.452 | 0.267 | 1.560 | 0.418        | 0.459 $\pm$ 0.331 | 0.099 | 0.960 |
|                                                               | Intergenic Regions   | 0.711    | 0.817 $\pm$ 0.546 | 0.156 | 1.836 | 0.397        | 0.467 $\pm$ 0.361 | 0.056 | 1.198 |
|                                                               | Synonymous Sites     | 1.649    | 1.895 $\pm$ 1.182 | 0.530 | 4.037 | 1.097        | 1.388 $\pm$ 1.104 | 0.362 | 3.162 |
|                                                               | Non-synonymous Sites | 0.552    | 0.693 $\pm$ 0.542 | 0.144 | 1.736 | 0.340        | 0.457 $\pm$ 0.409 | 0.098 | 1.198 |
|                                                               | CDS                  | 0.746    | 0.861 $\pm$ 0.547 | 0.224 | 1.882 | 0.439        | 0.551 $\pm$ 0.417 | 0.138 | 1.299 |
| <b>Population Mutation Rate</b><br>( $\theta_w \times 10^3$ ) | UTR                  | 1.081    | 1.198 $\pm$ 0.670 | 0.406 | 2.367 | 0.670        | 0.777 $\pm$ 0.500 | 0.220 | 1.713 |
|                                                               | Exon                 | 0.915    | 0.990 $\pm$ 0.475 | 0.366 | 1.853 | 0.543        | 0.607 $\pm$ 0.356 | 0.178 | 1.266 |
|                                                               | Intron               | 1.184    | 1.222 $\pm$ 0.387 | 0.714 | 1.860 | 0.736        | 0.775 $\pm$ 0.288 | 0.406 | 1.261 |
|                                                               | Intergenic Regions   | 1.186    | 1.229 $\pm$ 0.477 | 0.508 | 2.033 | 0.709        | 0.772 $\pm$ 0.347 | 0.354 | 1.418 |

**Table S4. Population genetics features for protein coding gene in rhesus macaque.**

|                                                               |                      | Autosome |                   |       |        | X Chromosome |                   |       |       |
|---------------------------------------------------------------|----------------------|----------|-------------------|-------|--------|--------------|-------------------|-------|-------|
|                                                               |                      | Median   | Mean $\pm$ SD     | 5%    | 95%    | Median       | Mean $\pm$ SD     | 5%    | 95%   |
| <b>Nucleotide Diversity</b><br>( $\pi \times 10^3$ )          | Synonymous Sites     | 2.738    | 3.328 $\pm$ 2.670 | 0.373 | 8.299  | 1.297        | 1.787 $\pm$ 1.785 | 0.199 | 4.955 |
|                                                               | Non-synonymous Sites | 0.419    | 0.775 $\pm$ 1.037 | 0.039 | 2.767  | 0.263        | 0.585 $\pm$ 0.837 | 0.037 | 2.363 |
|                                                               | CDS                  | 0.977    | 1.263 $\pm$ 1.109 | 0.142 | 3.300  | 0.450        | 0.681 $\pm$ 0.748 | 0.066 | 2.289 |
|                                                               | UTR                  | 1.650    | 2.035 $\pm$ 1.709 | 0.271 | 5.011  | 0.758        | 1.071 $\pm$ 1.083 | 0.124 | 3.217 |
|                                                               | Exon                 | 1.277    | 1.512 $\pm$ 1.087 | 0.287 | 3.483  | 0.537        | 0.737 $\pm$ 0.703 | 0.096 | 2.162 |
|                                                               | Intron               | 2.274    | 2.334 $\pm$ 1.054 | 0.979 | 3.883  | 1.134        | 1.247 $\pm$ 0.904 | 0.395 | 2.285 |
|                                                               | Intergenic Regions   | 2.107    | 2.256 $\pm$ 1.135 | 0.711 | 4.287  | 1.012        | 1.161 $\pm$ 0.717 | 0.256 | 2.509 |
| <b>Population Mutation Rate</b><br>( $\theta_w \times 10^3$ ) | Synonymous Sites     | 4.446    | 4.989 $\pm$ 2.913 | 1.326 | 10.462 | 2.024        | 2.553 $\pm$ 1.947 | 0.657 | 5.669 |
|                                                               | Non-synonymous Sites | 0.939    | 1.329 $\pm$ 1.283 | 0.191 | 3.903  | 0.488        | 0.841 $\pm$ 0.945 | 0.130 | 3.030 |
|                                                               | CDS                  | 1.709    | 2.006 $\pm$ 1.343 | 0.461 | 4.547  | 0.706        | 0.969 $\pm$ 0.850 | 0.217 | 2.840 |
|                                                               | UTR                  | 2.847    | 3.179 $\pm$ 1.984 | 0.880 | 6.505  | 1.240        | 1.583 $\pm$ 1.302 | 0.420 | 3.928 |
|                                                               | Exon                 | 2.146    | 2.368 $\pm$ 1.300 | 0.715 | 4.760  | 0.839        | 1.059 $\pm$ 0.818 | 0.247 | 2.801 |
|                                                               | Intron               | 3.327    | 3.395 $\pm$ 1.165 | 1.800 | 5.202  | 1.515        | 1.625 $\pm$ 0.928 | 0.642 | 2.657 |
|                                                               | Intergenic Regions   | 3.300    | 3.355 $\pm$ 1.276 | 1.491 | 5.643  | 1.402        | 1.533 $\pm$ 0.748 | 0.467 | 2.922 |

**Table S5. Population genetics features across the rhesus macaque genome.**

|                     |                                                     | 300 bps |                    |        |       | 3M bps |                    |        |        |
|---------------------|-----------------------------------------------------|---------|--------------------|--------|-------|--------|--------------------|--------|--------|
|                     |                                                     | Median  | Mean $\pm$ SD      | 5%     | 95%   | Median | Mean $\pm$ SD      | 5%     | 95%    |
| <b>Autosome</b>     | Nucleotide Diversity ( $\pi \times 10^3$ )          | 2.327   | 2.716 $\pm$ 2.009  | 0.215  | 6.515 | 2.694  | 2.694 $\pm$ 0.472  | 1.951  | 3.445  |
|                     | Population Mutation Rate ( $\theta_w \times 10^3$ ) | 3.549   | 3.866 $\pm$ 2.109  | 0.710  | 7.808 | 3.829  | 3.828 $\pm$ 0.584  | 2.892  | 4.745  |
|                     | Tajima's D                                          | -0.746  | -0.660 $\pm$ 0.746 | -1.700 | 0.644 | -1.067 | -1.067 $\pm$ 0.117 | -1.222 | -0.925 |
|                     | Fu and Li's D*                                      | -0.470  | -0.524 $\pm$ 1.104 | -2.433 | 1.078 | -1.171 | -1.173 $\pm$ 0.226 | -1.491 | -0.885 |
|                     | Fu and Li's F*                                      | -0.608  | -0.674 $\pm$ 1.070 | -2.595 | 0.920 | -1.352 | -1.356 $\pm$ 0.208 | -1.656 | -1.086 |
| <b>X Chromosome</b> | Nucleotide Diversity ( $\pi \times 10^3$ )          | 1.236   | 1.576 $\pm$ 1.537  | 0.000  | 4.577 | 1.550  | 1.545 $\pm$ 0.395  | 1.016  | 2.138  |
|                     | Population Mutation Rate ( $\theta_w \times 10^3$ ) | 1.558   | 1.994 $\pm$ 1.537  | 0.000  | 4.674 | 1.956  | 1.953 $\pm$ 0.432  | 1.361  | 2.648  |
|                     | Tajima's D                                          | -0.411  | -0.382 $\pm$ 0.746 | -1.484 | 1.157 | -0.817 | -0.814 $\pm$ 0.220 | -1.052 | -0.547 |
|                     | Fu and Li's D*                                      | -0.045  | -0.342 $\pm$ 1.042 | -2.439 | 0.913 | -1.006 | -1.018 $\pm$ 0.333 | -1.434 | -0.618 |
|                     | Fu and Li's F*                                      | -0.024  | -0.411 $\pm$ 1.061 | -2.505 | 1.012 | -1.123 | -1.127 $\pm$ 0.336 | -1.462 | -0.726 |

**Table S7. New population genetics annotations in RhesusBase PopGateway**

| <b>Categories</b>                       | <b>Entries</b>    |
|-----------------------------------------|-------------------|
| SNP                                     | 46,146,548        |
| Population Mutation Rate ( $\theta_w$ ) | 9,020,424         |
| Nucleotide Diversity ( $\pi$ )          | 9,020,424         |
| Tajima's D                              | 8,937,574         |
| Fu and Li's D*                          | 8,937,574         |
| Fu and Li's F*                          | 8,937,574         |
| Linkage Disequilibrium                  | 8,130,256         |
| McDonald-Kreitman Test                  | 33,776            |
| <b>Total</b>                            | <b>99,164,150</b> |
